# Supplementary material for: Interference between variants of peach latent mosaic viroid reveals novel features of its fitness landscape: implications for detection
Source: PubMed Central journal article supplement (PMC5314366; doi:10.1038/srep42825), 2017-02-17
Supplement: srep42825-s1.pdf [file srep42825-s1.pdf]

**Interference between variants of peach latent mosaic viroid reveals novel features of its fitness landscape: implications for detection**

Pedro Serra<sup>a</sup>, Edson Bertolini<sup>b,c</sup>, M. Carmen Martínez<sup>b</sup>, Mariano Cambra<sup>b</sup> & Ricardo Flores<sup>a</sup>

**Table S1. PLMVd primers for RT-PCR, and sets of PLMVd primers and probes for TaqMan rtRT-PCR**

| Primers <sup>a</sup> | Sequence (5'→3')               | Positions <sup>b</sup> | Use    |
|----------------------|--------------------------------|------------------------|--------|
| RF43 (c)             | CTGGATCACACCCCCTCGGAACCAACCGCT | 207-177                | RT-PCR |
| RF44 (i)             | TGTGATCCAGGTACCGCCGTAGAAACT    | 198-224                | RT-PCR |
| RF1251 (c)           | GGACCGGGTTTGAATCCCGGG          | 260-240                | RT-PCR |
| RF1252 (i)           | CCCTCAGAGGTGACTCTGAGTGAAAGG    | 261-287                | RT-PCR |
| RF1332 (c)           | TCCAGTTTCTACGGCGGTACC          | 227-207                | RT-PCR |
| RF1333 (i)           | TTACGACGTCTACCCGGGATTC         | 228-249                | RT-PCR |

  

| Primers and probes <sup>a</sup> | Sequence (5'→3')           | Positions <sup>b</sup> | Use                       |
|---------------------------------|----------------------------|------------------------|---------------------------|
| RP1 (c)                         | ACGGCGGTACCTGGATCA         | 217-200                | rtRT-PCR (reverse primer) |
| FP1 (i)                         | TGAGGTAAGGTGGGACTTTTCC     | 144-165                | rtRT-PCR (forward primer) |
| P1 (i)                          | CAAGCGGTTGGTTCCGAGGG       | 175-194                | rtRT-PCR (probe)          |
| RP1 (c)                         | ACGGCGGTACCTGGATCA         | 217-200                | rtRT-PCR (reverse primer) |
| FP1 (i)                         | TGAGGTAAGGTGGGACTTTTCC     | 144-165                | rtRT-PCR (forward primer) |
| P2 (i)                          | TGAGCGGTCGAACCCAGGGG       | 175-194                | rtRT-PCR (probe)          |
| RP2 (c)                         | GGGACCGGGWTTGAAT           | 261-246                | rtRT-PCR (reverse primer) |
| FP2 (i)                         | CAATGASGTAAGGTGGGACT       | 141-160                | rtRT-PCR (forward primer) |
| P3 (i)                          | GGTACCGCCGTAGAAACTGGGTTACG | 207-232                | rtRT-PCR (probe)          |

<sup>a</sup>(c), complementary; (i), identical<sup>b</sup>Numbering refers to PLMVd reference variant



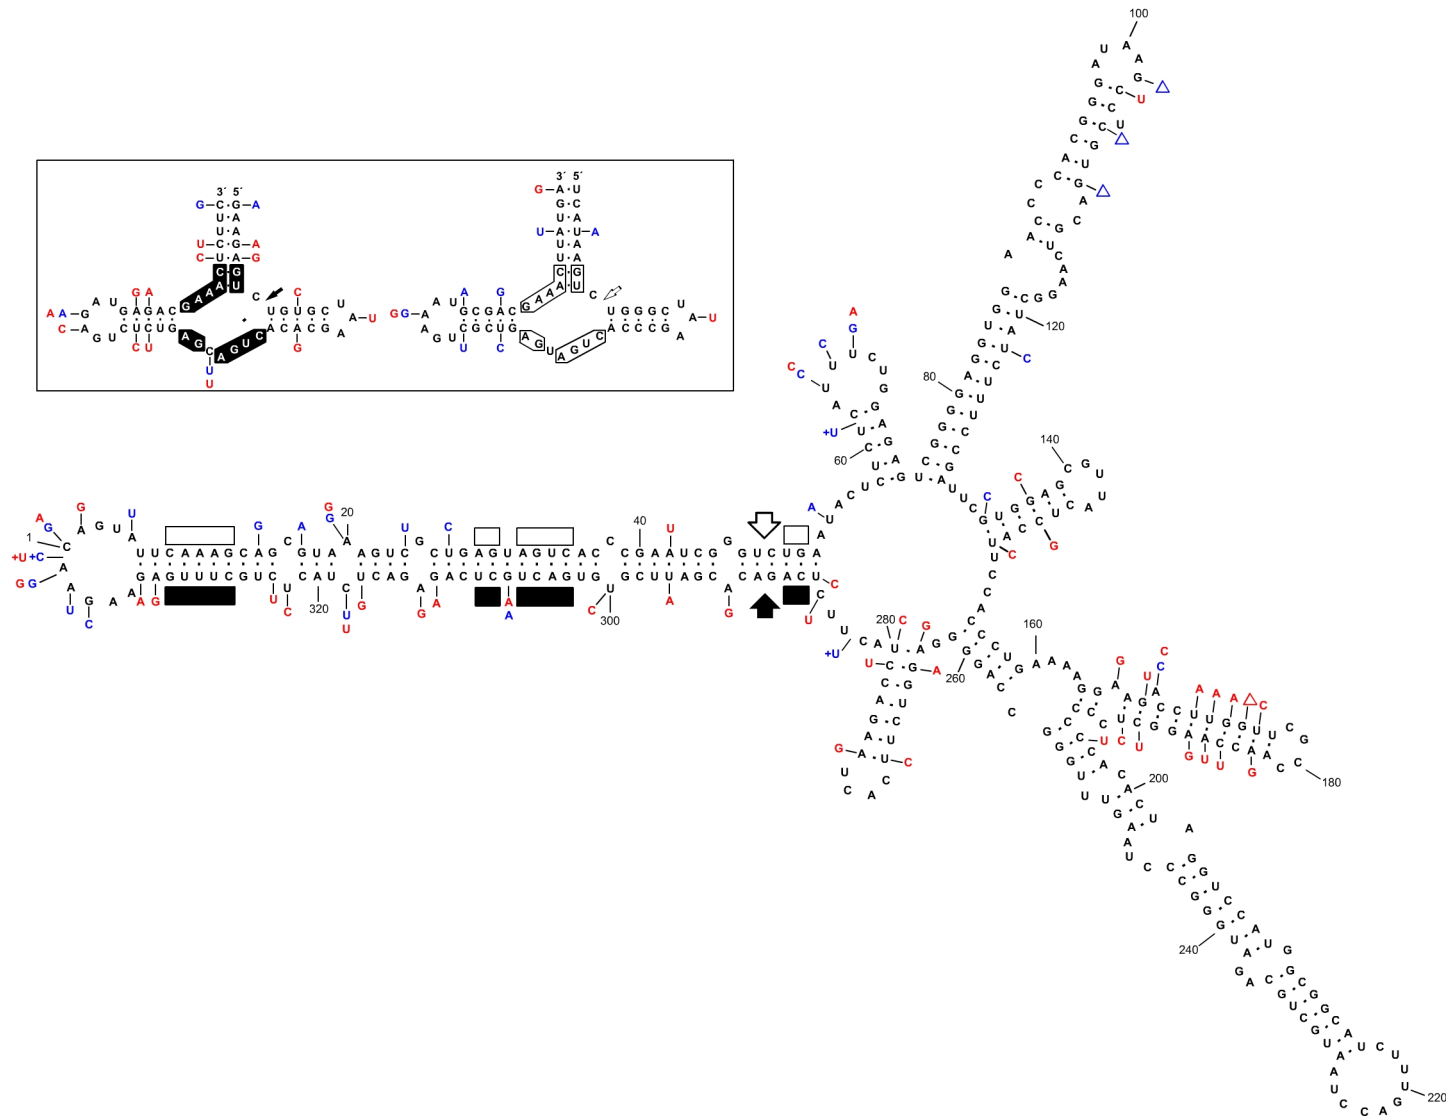

**Fig. S2.** Primary and proposed secondary structure for the PLMVd minus strand of the reference variant GenBank M83545.1 (Hernández and Flores, 1992) with two minor corrections (Ambrós et al., 1998). Changes in the representative symptomatic variant of class I (gds6) (Ambrós et al., 1998) and in the representative variant of class II (v1.1) (this work) are denoted with blue and red characters, respectively. Numbering is the same as in the plus strand. *Upper inset*, hammerhead structures of the PLMVd plus and minus strands with the self-cleavage sites marked with arrows. Substitutions in variants gds6 and v1.1 do not disrupt the helices flanking the central core of 13 nucleotides (boxed) conserved in most natural hammerhead structures of viroid and viroid-like satellite RNAs. Other details as in Fig 2.
